# Supplementary material for: Creation of de novo cryptic splicing for ALS/FTD precision medicine
Source: PubMed Central journal article supplement — bioRxiv. 2023 Nov 15:2023.11.15.565967. Preprint. [Version 1] doi: 10.1101/2023.11.15.565967 (PMC10680699; doi:10.1101/2023.11.15.565967), 2023-11-15
Supplement: NIHPP2023.11.15.565967V1-supplement-1.pdf [file NIHPP2023.11.15.565967V1-supplement-1.pdf]

Supplementary Figure 1

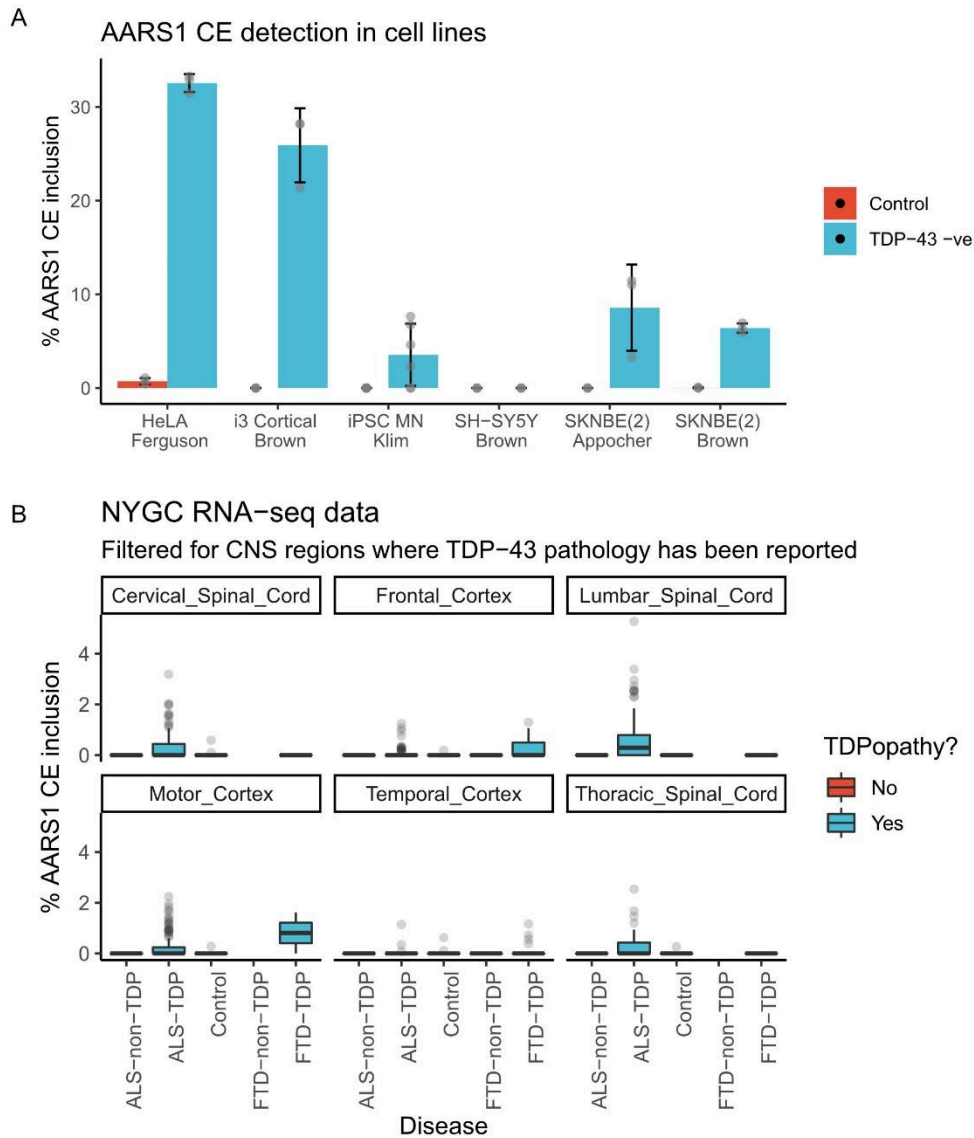

**Fig. S1.**

**A:** *AARS1* cryptic exon inclusion percentage for various cell lines in which TDP-43 levels were reduced artificially; error bars show standard deviation. **B:** *AARS1* cryptic exon inclusion for bulk RNA seq from various tissues and patients in the NYGC dataset.

Supplementary Figure 2

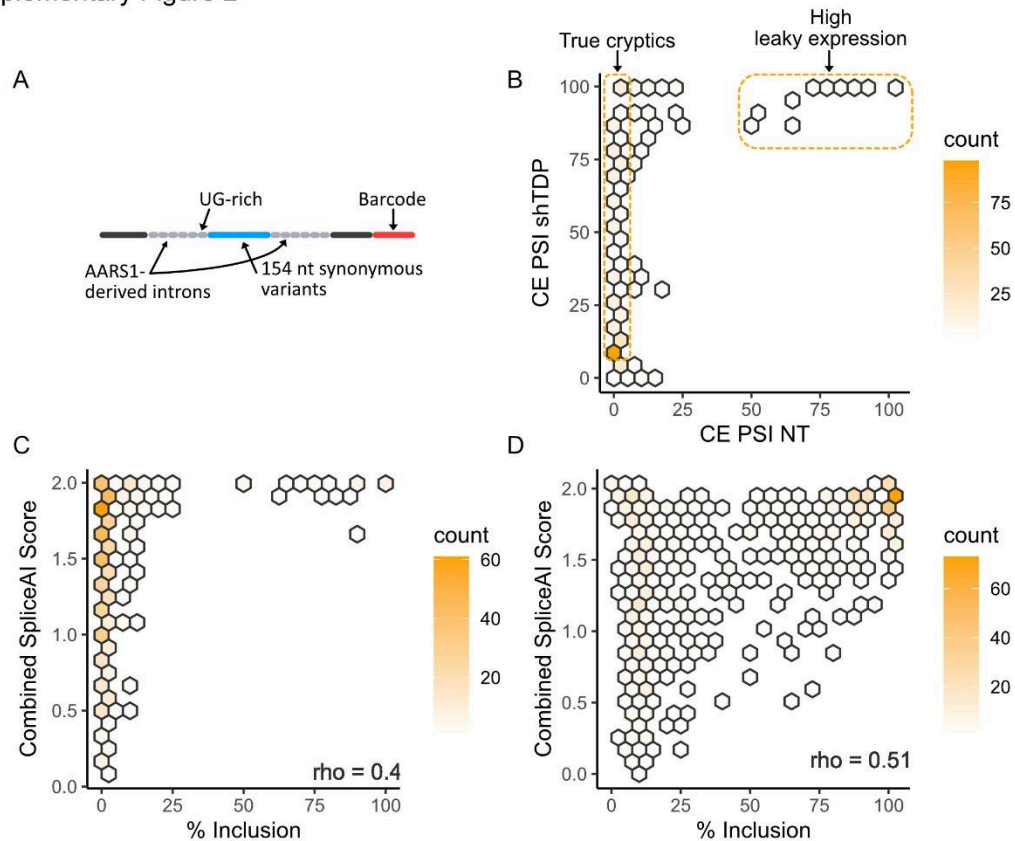

**Fig. S2.**

**A:** Schematic of the barcoded library of vectors containing different candidate CE sequences, each encoding the same amino acid sequence (in this case, a fragment of *S. pyogenes* Cas9) but with different codon optimisation. **B:** Heatmap of % CE inclusion for library of Cas9-fragment-encoding cryptic exons in SK-N-BE(2) cells with TDP-43 knockdown versus untreated cells (“NT” = “not treated”). Areas corresponding to “True cryptics” (i.e. those that are only expressed upon TDP-43 knockdown) and “High leaky expression” (i.e. those that are expressed regardless of TDP-43 knockdown) are highlighted. **C:** Heatmap of the SpliceAI score of the candidate CE acceptor and donor splice sites against the PSI of each CE in SK-N-BE(2) cells without TDP-43 knockdown (i.e. untreated cells); Spearman correlation shown (bottom). **D:** Heatmap of the SpliceAI score of the candidate CE acceptor and donor splice sites against the PSI of each CE in SK-N-BE(2) cells with TDP-43 knockdown; Spearman correlation shown.



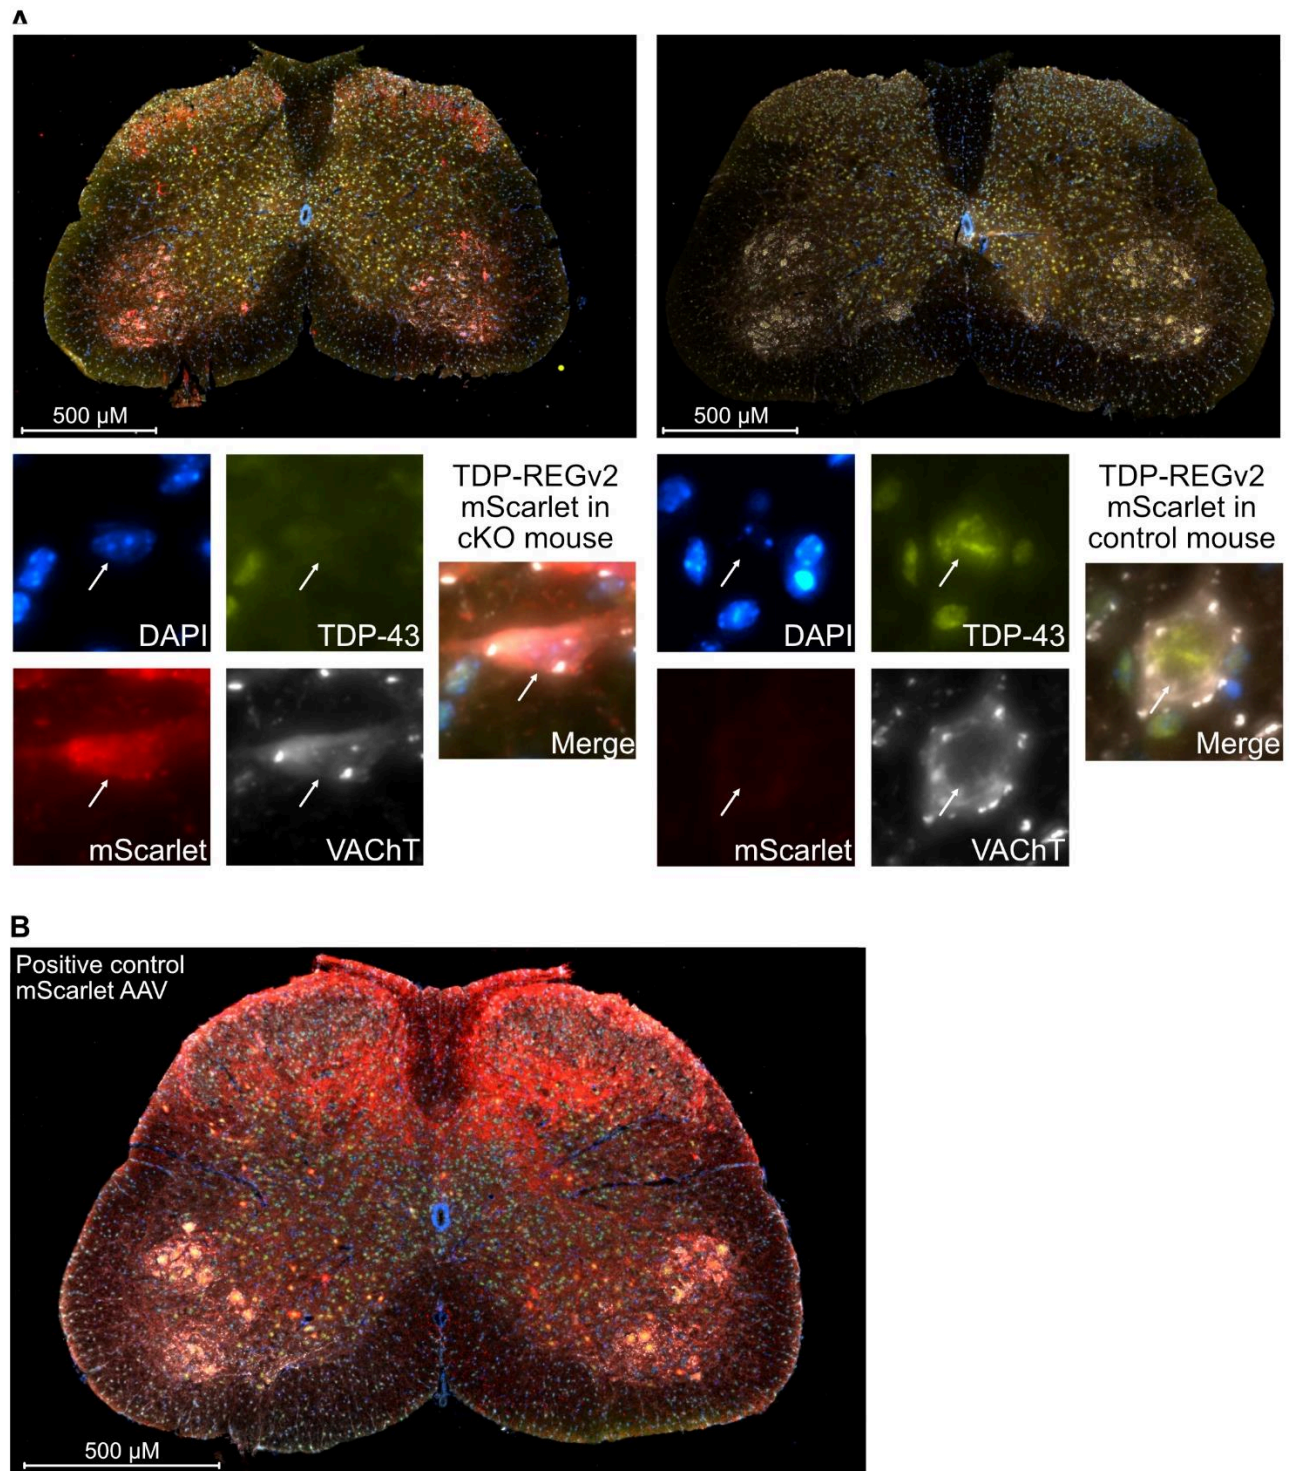

**Fig. S4.**

A: Fluorescence microscopy of spinal cords sections from TDP-43 cKO or control mice (left and right respectively) injected with a TDP-REGv2 mScarlet AAV (construct #7). Magnifications of

two representative motor neurons are shown below. Blue = DAPI, Yellow = TDP-43, White = VaChT, Red = mScarlet). B: Representative fluorescence microscopy image of a spinal cord section from a control mouse injected with a positive control mScarlet AAV (i.e. without TDP-REG); colouring is the same as Part A.

Supplementary Figure 5

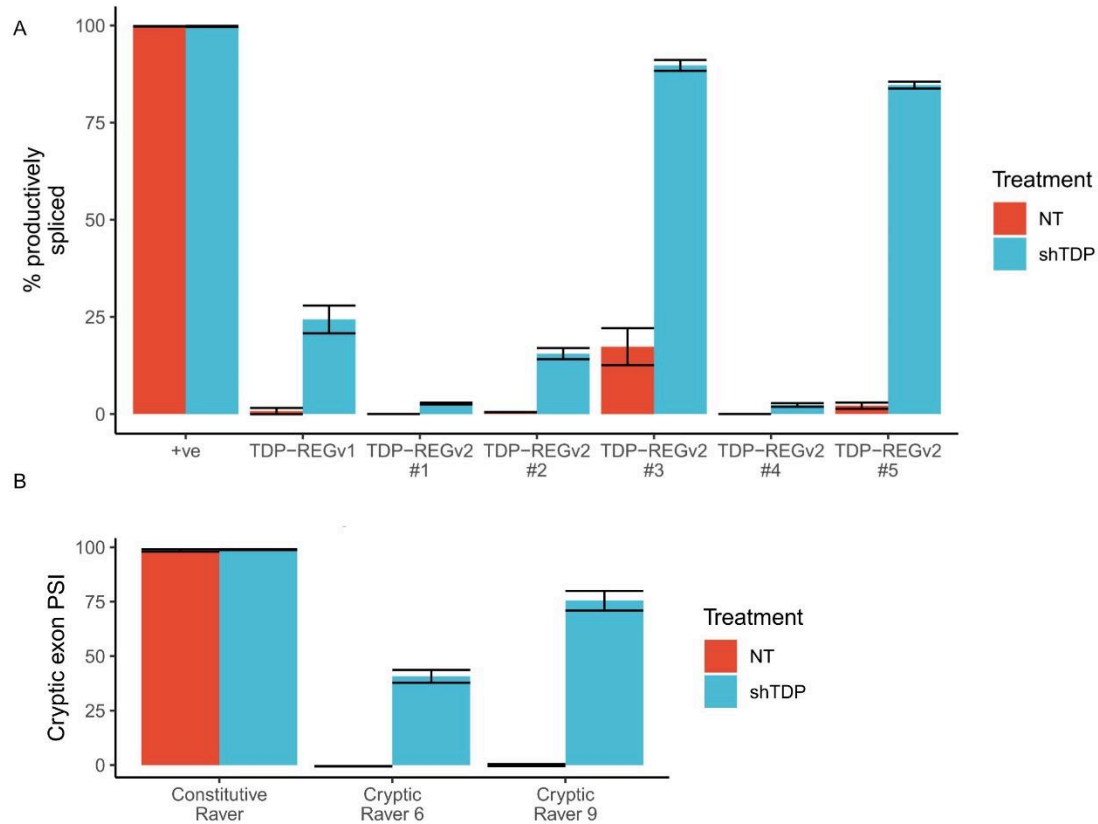

**Fig. S5.**

**A:** Nanopore sequencing of seven Luciferase constructs (one positive control, one TDP-REGv1, and five TDP-REGv2) with or without TDP-43 knockdown; error bars show standard deviation across replicates. **B:** Quantification of RT-PCRs detecting the internal cryptic exons present in TDP-REGv2 TDP-43/Raver1 constructs. In contrast with the data shown in Figure 4, in this figure the cells were stably-expressing the vectors, and the TDP-43/Raver1 fusion protein was functional (i.e. without the 2FL mutation); error bars show standard deviation.

Supplementary Figure 6

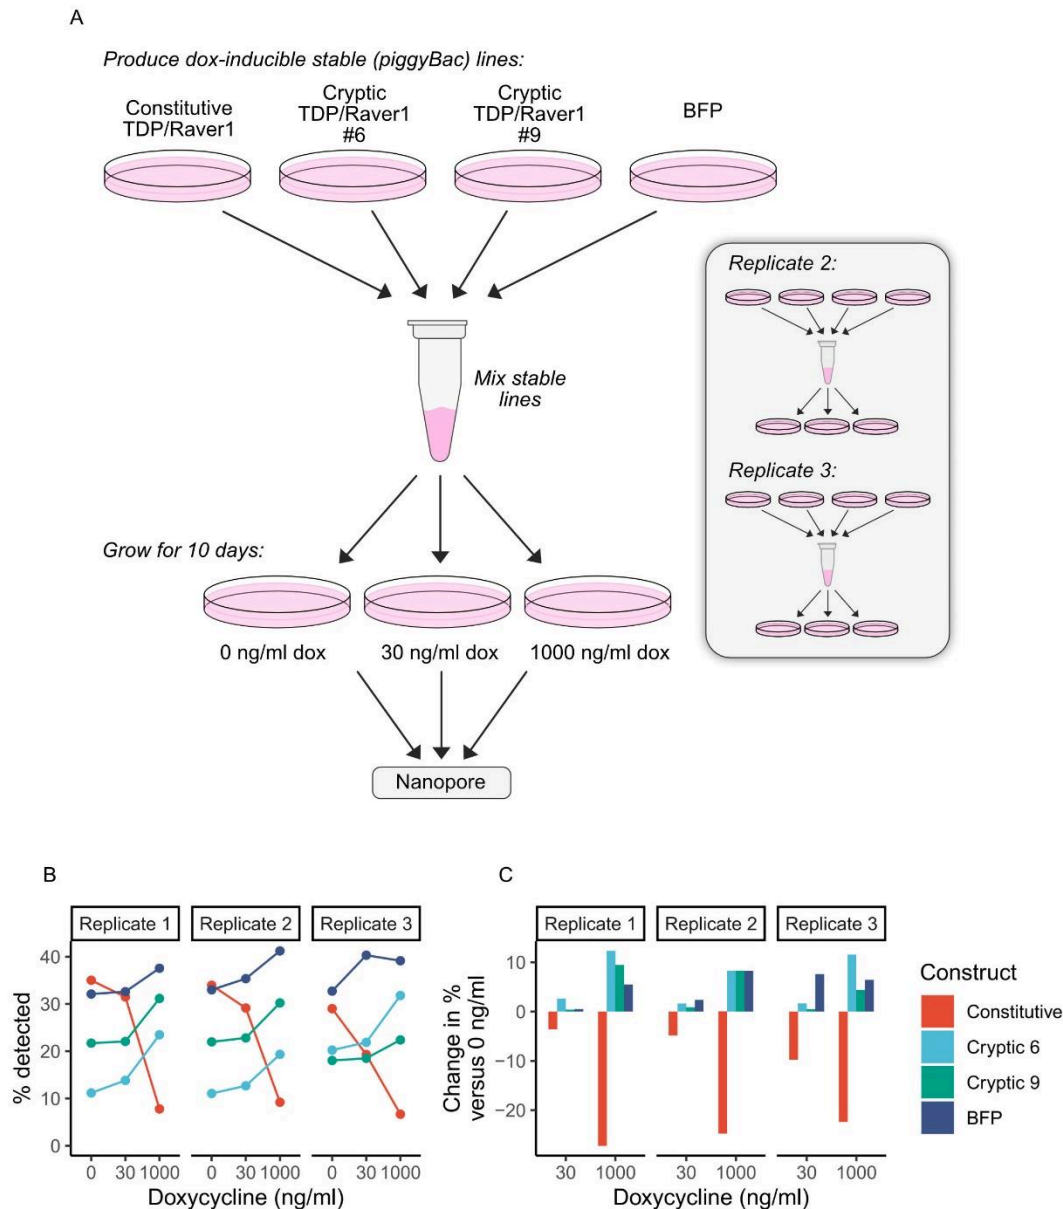

**Fig. S6.**

**A:** A schematic showing the experimental procedure for the growth competition assay. **B:** Quantification of Nanopore reads derived from each of the four constructs used to make stable piggyBac lines for each doxycycline concentration and each replicate. (Note that differences in % at 0 ng/ml doxycycline can be explained by PCR bias during Nanopore library preparation and unequal initial mixtures of the different lines; comparisons are only valid between doxycycline concentrations within the same replicate.) **C:** A second visualisation of the same Nanopore data, where values for each construct are compared with their equivalent value when no doxycycline was added, for clarity.

**Table S1.**

Antibodies used in western blotting and microscopy experiments.

| <b>Target</b>                | <b>Brand</b>      | <b>Product code</b> | <b>Lot</b>  | <b>Use</b>                                                  |
|------------------------------|-------------------|---------------------|-------------|-------------------------------------------------------------|
| Anti-Mouse IgG1 (HRP)        | abcam             | ab97240             | GR3365481-1 | Western blotting                                            |
| Anti-Rabbit IgG H&L (HRP)    | abcam             | ab6721              | GR3242092-4 | Western blotting                                            |
| FLAG                         | Sigma             | F3165               | 035K6196    | Western blotting                                            |
| $\alpha$ -Tubulin            | Sigma             | T5168               | 038M4813V   | Western blotting                                            |
| TDP-43                       | Proteintech       | 10782-2-AP          | 103682      | Western blotting; immunofluorescence of neuroblastoma lines |
| Rabbit IgG (Alexa Fluor 647) | Abcam             | ab150079            | GR3444080-1 | Immunofluorescence of neuroblastoma lines                   |
| TDP-43                       | Biolegend         | 808301              | B305604     | Immunostaining of tissue                                    |
| RFP                          | Rockland          | 600-401-379         | 46317       | Immunostaining of tissue                                    |
| VACHT                        | Synaptic Systems  | 139105              | 4-26        | Immunostaining of tissue                                    |
| Rabbit IgG                   | Life Tech. Thermo | A-21207             |             | Immunostaining of tissue                                    |
| Rat IgG                      | Invitrogen        | A21208              | 206333      | Immunostaining of tissue                                    |
| Guinea pig IgG               | Invitrogen        | A21450              | 2446026     | Immunostaining of tissue                                    |



**Table S2.**

Details of animal experiments

| Genotype                    | DOB        | Virus                        | ICV Injection Date | Harvest Date |
|-----------------------------|------------|------------------------------|--------------------|--------------|
| TDP43 fl/fl;Chat-iCre +/-wt | 22/04/2023 | TDP-REGv1 mCherry            | 24/04/2023         | 22/05/2023   |
| TDP43 fl/wt;Chat-iCre +/-wt | 22/04/2023 | TDP-REGv1 mCherry            | 24/04/2023         | 22/05/2023   |
| TDP43 fl/fl;Chat-iCre +/-wt | 22/04/2023 | TDP-REGv1 mCherry            | 24/04/2023         | 22/05/2023   |
| TDP43 fl/fl;Chat-iCre +/-wt | 22/04/2023 | TDP-REGv1 mCherry            | 24/04/2023         | 22/05/2023   |
| TDP43 fl/wt;Chat-iCre +/-wt | 22/04/2023 | TDP-REGv1 mCherry            | 24/04/2023         | 22/05/2023   |
| TDP43 fl/fl;Chat-iCre +/-wt | 22/04/2023 | TDP-REGv1 mCherry            | 24/04/2023         | 22/05/2023   |
| TDP43 fl/wt;Chat-iCre +/-wt | 22/04/2023 | TDP-REGv1 mCherry            | 24/04/2023         | 22/05/2023   |
| TDP43 fl/fl;Chat-iCre +/-wt | 22/04/2023 | TDP-REGv1 mCherry            | 24/04/2023         | 22/05/2023   |
| TDP43 fl/wt;Chat-iCre +/-wt | 03/05/2023 | TDP-REGv1 mCherry            | 04/05/2023         | 23/06/2023   |
| TDP43 fl/wt;Chat-iCre +/-wt | 03/05/2023 | TDP-REGv1 mCherry            | 04/05/2023         | 23/06/2023   |
| TDP43 fl/fl;Chat-iCre +/-wt | 03/05/2023 | TDP-REGv1 mCherry            | 04/05/2023         | 23/06/2023   |
| TDP43 fl/wt;Chat-iCre +/-wt | 03/05/2023 | TDP-REGv1 mCherry            | 04/05/2023         | 23/06/2023   |
| TDP43 fl/wt;Chat-iCre +/-wt | 28/05/2023 | TDP-REGv2 mScarlet<br>#7     | 30/05/2023         | 28/06/2023   |
| TDP43 fl/fl;Chat-iCre +/-wt | 01/06/2023 | TDP-REGv2 mScarlet<br>#7     | 02/06/2023         | 28/06/2023   |
| TDP43 fl/fl;Chat-iCre +/-wt | 01/06/2023 | TDP-REGv2 mScarlet<br>#7     | 02/06/2023         | 28/06/2023   |
| TDP43 fl/fl;Chat-iCre +/-wt | 01/06/2023 | TDP-REGv2 mScarlet<br>#7     | 02/06/2023         | 28/06/2023   |
| TDP43 fl/fl;Chat-iCre +/-wt | 01/06/2023 | TDP-REGv2 mScarlet<br>#7     | 02/06/2023         | 28/06/2023   |
| TDP43 fl/wt;Chat-iCre +/-wt | 01/06/2023 | TDP-REGv2 mScarlet<br>#7     | 02/06/2023         | 28/06/2023   |
| TDP43 fl/fl;Sun1-GFP +/-    | 21/06/2023 | Positive control<br>mScarlet | 22/06/2023         | 12/07/2023   |
| TDP43 fl/fl;Sun1-GFP +/-    | 21/06/2023 | Positive control<br>mScarlet | 22/06/2023         | 12/07/2023   |
| TDP43 fl/fl;Sun1-GFP +/-    | 21/06/2023 | Positive control<br>mScarlet | 22/06/2023         | 12/07/2023   |
| TDP43 fl/fl;Sun1-GFP +/-    | 21/06/2023 | Positive control<br>mScarlet | 22/06/2023         | 12/07/2023   |
| TDP43 fl/wt;Chat-iCre +/-wt | 21/06/2023 | TDP-REGv2 mScarlet<br>#7     | 22/06/2023         | 03/08/2023   |
| TDP43 fl/wt;Chat-iCre +/-wt | 21/06/2023 | TDP-REGv2 mScarlet<br>#7     | 22/06/2023         | 03/08/2023   |
| TDP43 fl/fl;Chat-iCre +/-wt | 21/06/2023 | TDP-REGv2 mScarlet<br>#7     | 22/06/2023         | 03/08/2023   |
| TDP43 fl/fl;Chat-iCre +/-wt | 21/06/2023 | TDP-REGv2 mScarlet<br>#7     | 22/06/2023         | 03/08/2023   |

**Table S3.**

Primers used for RT-PCRs

| <b>Name</b>              | <b>Sequence</b>                              | <b>Purpose</b>                                                                                                              |
|--------------------------|----------------------------------------------|-----------------------------------------------------------------------------------------------------------------------------|
| AARS1 forward            | ACTTACTTTGGCGGGGATGA                         | RT-PCR of endogenous cryptic splicing                                                                                       |
| AARS1 reverse            | AGGTTCCAGATCTCCAGCAC                         | RT-PCR of endogenous cryptic splicing                                                                                       |
| UNC13A forward           | GTTCAAGAGGGGAATCTGACG                        | RT-PCR of endogenous cryptic splicing                                                                                       |
| UNC13A reverse           | GGGCACATATACTTGGAGGAG                        | RT-PCR of endogenous cryptic splicing                                                                                       |
| STMN2 forward            | GCTCTCTCCGCTGCTGTAG                          | RT-PCR of endogenous cryptic splicing                                                                                       |
| STMN2 cryptic reverse    | CTGTCTCTCTCTCTCGCACA                         | RT-PCR of endogenous cryptic splicing                                                                                       |
| STMN2 downstream reverse | CGAGGTTCCGGGTAAAAGCA                         | RT-PCR of endogenous cryptic splicing                                                                                       |
| check_tdp_splice_R_v2    | ATTGCTGATGTGTACAGAGATGC                      | Analysing TDP-43/Raver1 fusion protein splicing via RT-PCR; amplifying TDP-43/Raver1 constructs in growth competition assay |
| check_tdp_splice_F       | GATTTGTCAGGTTCACTGAGTATGAG                   | Analysing TDP-43/Raver1 fusion protein splicing via RT-PCR; amplifying TDP-43/Raver1 constructs in growth competition assay |
| nRV_growthC_BFP_F        | GGAGATCGATTCCGGATG<br>tcttcaagcagtccttccctg  | Amplifying BFP construct in growth competition assay                                                                        |
| nRV_growthC_BFP_R        | GCCTTCCACTAGATTCC<br>ACCCACTACCattaagcttgtgc | Amplifying BFP construct in growth competition assay                                                                        |
| Cas9_splice_F            | cgatctgctgaaaattatcaaggacaag                 | Check splicing of PE-Max vector via RT-PCR                                                                                  |
| Cas9_splice_R            | tccaccaccttcaactgtctg                        | Check splicing of PE-Max vector via RT-PCR                                                                                  |
